# Supplementary material for: Phenology Is Associated with Genetic and Stem Morphotype Variation in European Beech (Fagus sylvatica L.) Stands
Source: MDPI journal article supplement (doi:10.3390/f13050664), 2022-04-25
Supplement: s1 [file s1]

Archive with 1 entries (1 files):
- forests-1653447-supplementary.pdf
